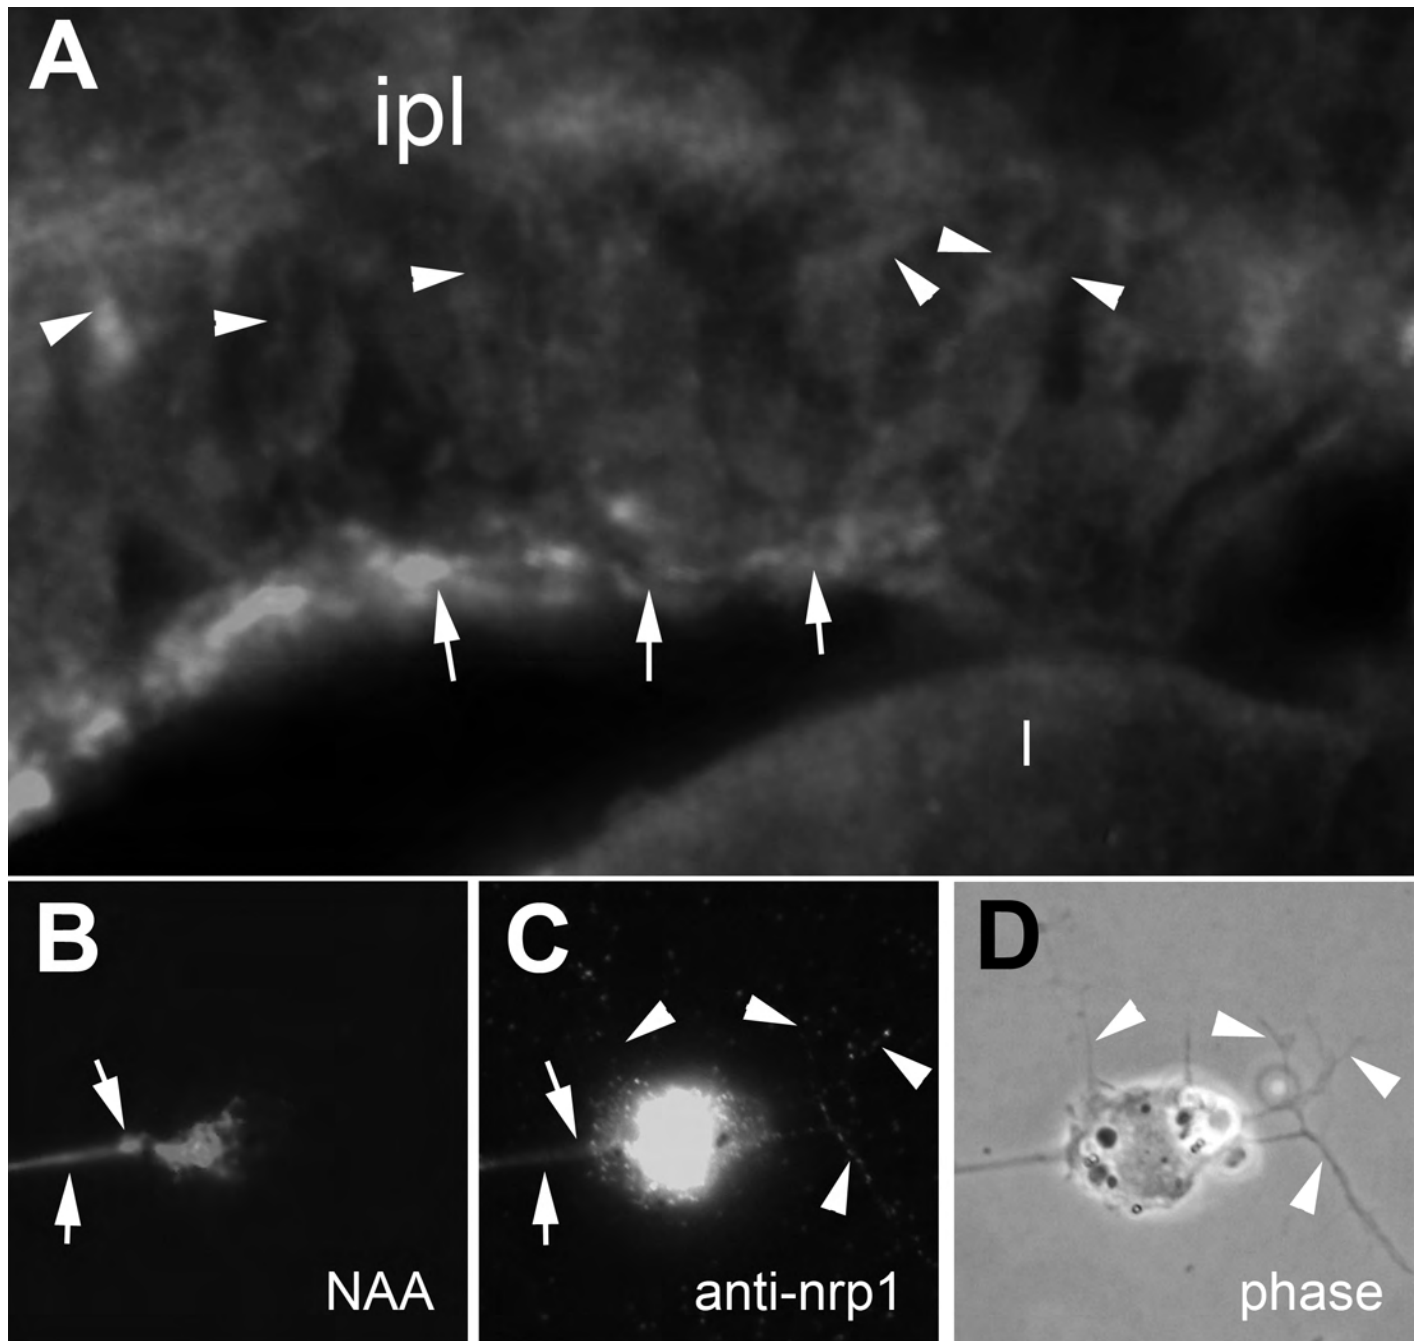

**Fig. S1. Nrp1 expressed in the dendrites of developing RGCs.** (A) An antibody against Nrp1 shows Nrp1-like immunoreactivity in the dendrites of developing RGCs (arrowheads) and their axons (arrows). (B-D) Isolated NAA-positive RGC in dissociated retinal culture shows NAA immunoreactivity in its axon (arrow) but not in its dendrites (arrowheads) (B), whereas the antibody against Nrp1 (C) labels both the axon and the dendrites. The same RGC is shown in phase in D. ipl, inner plexiform layer; I, lens.
